# Supplementary material
Source: publisher figshare collection journal article supplement (https://diabetesjournals.figshare.com/ndownloader/files/28013457)
Supplement: Supplementary file 1 [file 28013457]

**Supplementary Table 1.** Baseline characteristics of the entire cohort of adolescents and young adults with type 1 diabetes

| Characteristic    | With eating disorder | Without eating disorder | P value |
|-------------------|----------------------|-------------------------|---------|
| N                 | 168                  | 19,867                  |         |
| Age               | 27.1 ± 6.8           | 23.8 ± 7.9              | <0.001  |
| Sex               |                      |                         |         |
| Female            | 156 (92.9%)          | 9,623 (48.4%)           | <0.001  |
| Male              | 12 (7.1%)            | 10,244 (51.6%)          |         |
| Income            |                      |                         |         |
| Lowest            | 44 (26.2%)           | 4,062 (20.4%)           | 0.56    |
| 2                 | 29 (17.3%)           | 3,774 (19.0%)           |         |
| 3                 | 34 (20.2%)           | 3,961 (19.9%)           |         |
| 4                 | 29 (17.3%)           | 3,925 (19.8%)           |         |
| Highest           | 32 (19.0%)           | 3,995 (20.1%)           |         |
| Rurality          |                      |                         |         |
| Urban             | 120 (71.4%)          | 13,577 (68.3%)          | 0.51    |
| Semi-urban        | 36 (21.4%)           | 4,374 (22.0%)           |         |
| Rural             | 12 (7.1%)            | 1,916 (9.6%)            |         |
| Diabetes duration |                      |                         |         |
| <5 year           | 21 (12.5%)           | 4,003 (20.1%)           | <0.001  |
| 5 to <10 years    | 23 (13.7%)           | 4,717 (23.7%)           |         |
| 10 to <15 years   | 42 (25.0%)           | 4,327 (21.8%)           |         |
| 15+ years         | 82 (48.8%)           | 6,820 (34.3%)           |         |
